# Supplementary material for: E-cigarette exposure disrupts antitumor immunity and promotes metastasis
Source: Front Immunol. 2024 Aug 16;15:1444020. doi: 10.3389/fimmu.2024.1444020 (PMC11365074; doi:10.3389/fimmu.2024.1444020)
Supplement: Supplementary Table 4 — Tumor growth curves in Figure S2 . [file Table4.xlsx]

## Sheet: B16
days	Control															PG/VG + Nicotine Low (6 mg/mL)															PG/VG + Nicotine High (36 mg/mL)															PG/VG
8	0	13.5	0	0	0	0	0	0	0	0	0	0	0	0	0	0	0	13.5	12	16	16	35	26	155	68	55	34	18	25	30	16	13.5	4	0	4	16	17.6	28.7	21.4	23.6	38	18.5	26.1	12.5	31	12	25	12	25
11	62.5	162	27	4	4	15	22.6	106	15	21	40	87	106	57	68	126	4	121	198	77.5	125	166	89	345	408	378	289	166	311	356	275	294	175	4	216	255.5	281.7	458.8	342.4	377.5	690.1	295.8	416.2	222	264	155	311	102	287
13	486	421.874	269.5	100	384	208	322	489	355	487	377	512	614	435	478	320	4	800	668.25	294	386	478	377	659	788	844	529	413	697	725	489	596.062	676.875	198	365.625	493.75	544.4	886.7	661.7	729.5	1156.2	571.6	804.3	548	658	487	698	315	644
15	1912.5	608	688.5	546.75	567	732	512	864	589	647	654	1016	1211	847	904	700	4	1568	1119.25	375	698	748	915	1265	1333	1467	1122	869	1204	1371	765	1275.88	1549.12	676.875	1124.12	852	939.3	1530.1	1141.8	1258.8	1543	986.3	1387.8	832	955	1147	1477	944	1522
18	3034.5	718	1862	1223.31	2081.25	1864	1744	2054	1787	1344	1598	2103	2069	1948	1966	909.562	0	3726	1119.25	1047.38	1684	1876	1888	2411	2187	1936	1547	1376	1899	2165	1558.75	1478	2182.75	1690	1890	1774	1955.8	2185	2377.3	2621		2053.6	1874	1766	1943	1871	2147	1644	2256
[truncated: 11 more columns]

## Sheet: MC38
days	Control															PG/VG + Nicotine Low (6 mg/mL)															PG/VG + Nicotine High (36 mg/mL)															PG/VG
0	0	0	0	0	0	0	0	0	0	0	0	0	0	0	0	0	0	0	0	0	0	0	0	0	0	0	0	0	0	0	0	0	0	0	0	0	0	0	0	0	0	0	0	0	0	0	0	0	0
4	0	0	0	0	0	0	0	0	0	0	0	0	0	0	4	0	0	0	0	0	0	0	0	0	0	0	0	0	0	0	0	0	0	0	0	0	0	0	0	0	0	0	0	0	4	0	0	0	0
7	0	0	0	0.5	4	0	0	0	4	4	0	0	0	0	4	1	0	1	13.5	27	0	4	0	4	0	4	4	4	0	0	4	9.375	0.5	44	5.5	0	0	0	4	4	0	0	0	0	4	12	25	12	25
9	4	1	18	60	48	0	0	0	18	24	16	0	24	24	56	4	1.5	1.5	70.875	91.125	12	25	12.5	25	16	35	64	48	25	32	18	60	15.625	108	18	16	32	32	68	97	25	32	25	25	16	25	60	24	60
11	6	126	150	118.75	232.375	123	154	167	133	154	143	135	166	143	122	4	1.5	20.75	125	101.25	75	132	89	112	106	114	88	132	125	116	36	68	36	158.438	55.125	114	132	165	108	215	144	175	133	165	16	75	98	64	112
14	6	162	175	207	253.5	166	221	257	234	266	284	256	245	244	254	4	4.5	36.75	225	126.562	175	155	167	201	224	232	187	246	299	278	125	121.5	67.375	257.25	131.25	247	258	288	231	344	269	281	263	345	32	142	188	123	245
16	6	294	355.25	379.688	351.562	345	313	348	394	345	321	322	364	356	375	10	4.5	100	464	204.188	311	315	348	428	464	478	324	401	389	403	392	306.312	226.875	330.74	365.625	487	355	406	421	504	422	438	465	488	135	258	314	267	408
18	40	400	367.5	672	464.062	589	611	610	742	735	603	615	638	694	704	26	12	259	480	576	566	591	635	745	799	768	685	742	655	696	416.5	729	404.25	404.25	496	644	602	625	677	758	768	799	783	746	255	447	678	559	726
21	40	496	687	923	832	885	941	846	914	920	848	863	877	859	904	101	251	684	380	850.5	869	855	831	987	996	1045	898	967	1054	887	910	900	950	688.5	614.125	879	893	964	975	942	963	997	925	964	367	698	948	858	993
[truncated: 11 more columns]

## Sheet: TRAMP-C2
days	Control															PG/VG + Nicotine Low (6 mg/mL)															PG/VG + Nicotine High (36 mg/mL)															PG/VG
42	96	117	88	4	56	24	13	12	20	45	21	23	15	23	25	147.875	147.875	27	79.625	2	14	23	40	37	24	15	16	11	15	24	93.75	70.875	56	169	18.5	12	25	67	69	15	20	14	13	15	21	110	85	76	123
44	104	225	143.75	4	100	75	47	48	84	99	67	54	78	79	101	158.438	272	31	108	3	43	49	52	56	37	49	55	53	50	67	220.5	153	126	179.562	48	45	67	99	105	43	64	70	35	46	55	184	156	175	241
47	120	272	150	13.5	190.125	96	76	77	136	154	142	141	128	135	184	288	325.125	81	226.875	4	76	88	92	76	85	112	109	86	114	133	269.5	405	334	361.25	100	79	103	133	165	79	96	104	77	79	93	224	256	315	425
49	226.875	384.75	318.5	22.5	336	128.22	124.29	108.52	240.72	232	249	215	259	266	314	304	361.125	138.5	316.875	20	151.98	130.83	163.73	162.02	147.91	206.18	195.22	122.68	177.1	207	294	451.25	478	445.5	187	136.63	195.25	256.43	273.92	153.08	176.89	142.78	147	160	178	274	344	401	497
51	279	445.5	496	68.75	352	193.65	175.49	153.56	249.32	384	348	357	395	326	457	445.5	580.688	211.5	367.5	49.5	300.98	257.23	287.42	194.89	301.44	321.26	240.72	175.26	376	441	486	473.812	569	550	290	148.84	232.64	535.89	408.07	221.56	243.22	312.04	248.21	300	287	455	472	504	611
54	379.75	486	825	126	445.5	289.77	224.07	312.04	359.2	566	597	577	484	399	500	486	333	371.875	544	54	511.47	267.81	443.44	368.13	369.26	542.82	475	267.95	541.64	639	925.75	864	677	661.5	400	225.66	356.44	703.02	822.32	455.66	397.47	468.85	471.37	468	479	514	522	578	648
56	392	700	1124.12	239.062	526.5	320.54	465	500.53	747.22	763	799	678	603	522	634	526.5	435.5	420.75	544	104	714	651.11	568.77	412.03	486.48	957.77	612	542.82	596.6	723	991.875	900	861	689.062	526.5	692.37	712.15	835	339.12	586.13	634.52	689	713.99	680	693	574	586	603	679
58	416.5	750	1224	500	586.625	621	796	814	945	813	1165	886	847	835	902	586.625	574	676.875	729	131.625	789	635.2	744	781.85	759.88	1058	815	837.33	794.33	936	1080	1008	1036	826.562	650	862	1055	1096	752	865	814	1080	899	906	875	725	700	712	732
61	592	907.5	1605.5	650	750	944	933	1011	1335.29	1080.33	1335.29	1104	1206	1184	1269	700	933.75	925	950	141.75	893	824	997	956	994	1144	1065	1109	948	1205	1267.5	1080	1147	1080	786.5	1025	1235	1356.53	966	1044	1076	1232	1377	1260	1148	884	756	768	799
64	896	1629.44	1855	877.25	854.438	1036	1255	1276	1856	1442	1755	1432	1528	1477	1464	1225.25	2586.38	1477	1468	367.5	1155	1137	1320	1246	1207	1377	1334	1425	1287	1566	1640.25	1171.88	1344	1224	1080	1326.65	1750	1763	1206	1318	1523	1545	1682.04	1604	1525	1014	986	953	944
68	1678	2304	2245	1267.5	1024.94	1526	1647	1889	2323	1978	2198	1948	2056	1937	1966	1743.75	2817.75	1988	1963	648	1677	1845	1965	1874	1886	1923	1968	2045	1906	2114	2688	1549.12	1846	1296	1568	1948	2203	2461.76	1825	1906	1944.02	2078	2090	2036	1969	1345	1401	1388	1523
	TRAMP-C2 takes around 40-45 days to become palpable
[truncated: 11 more columns]
